# Supplementary figures and images for: Uniparental Lineages from the Oldest Indigenous Population of Ecuador: The Tsachilas
Source: MDPI journal article supplement (doi:10.3390/genes12081273), 2021-08-20

PC2: 26,8 %

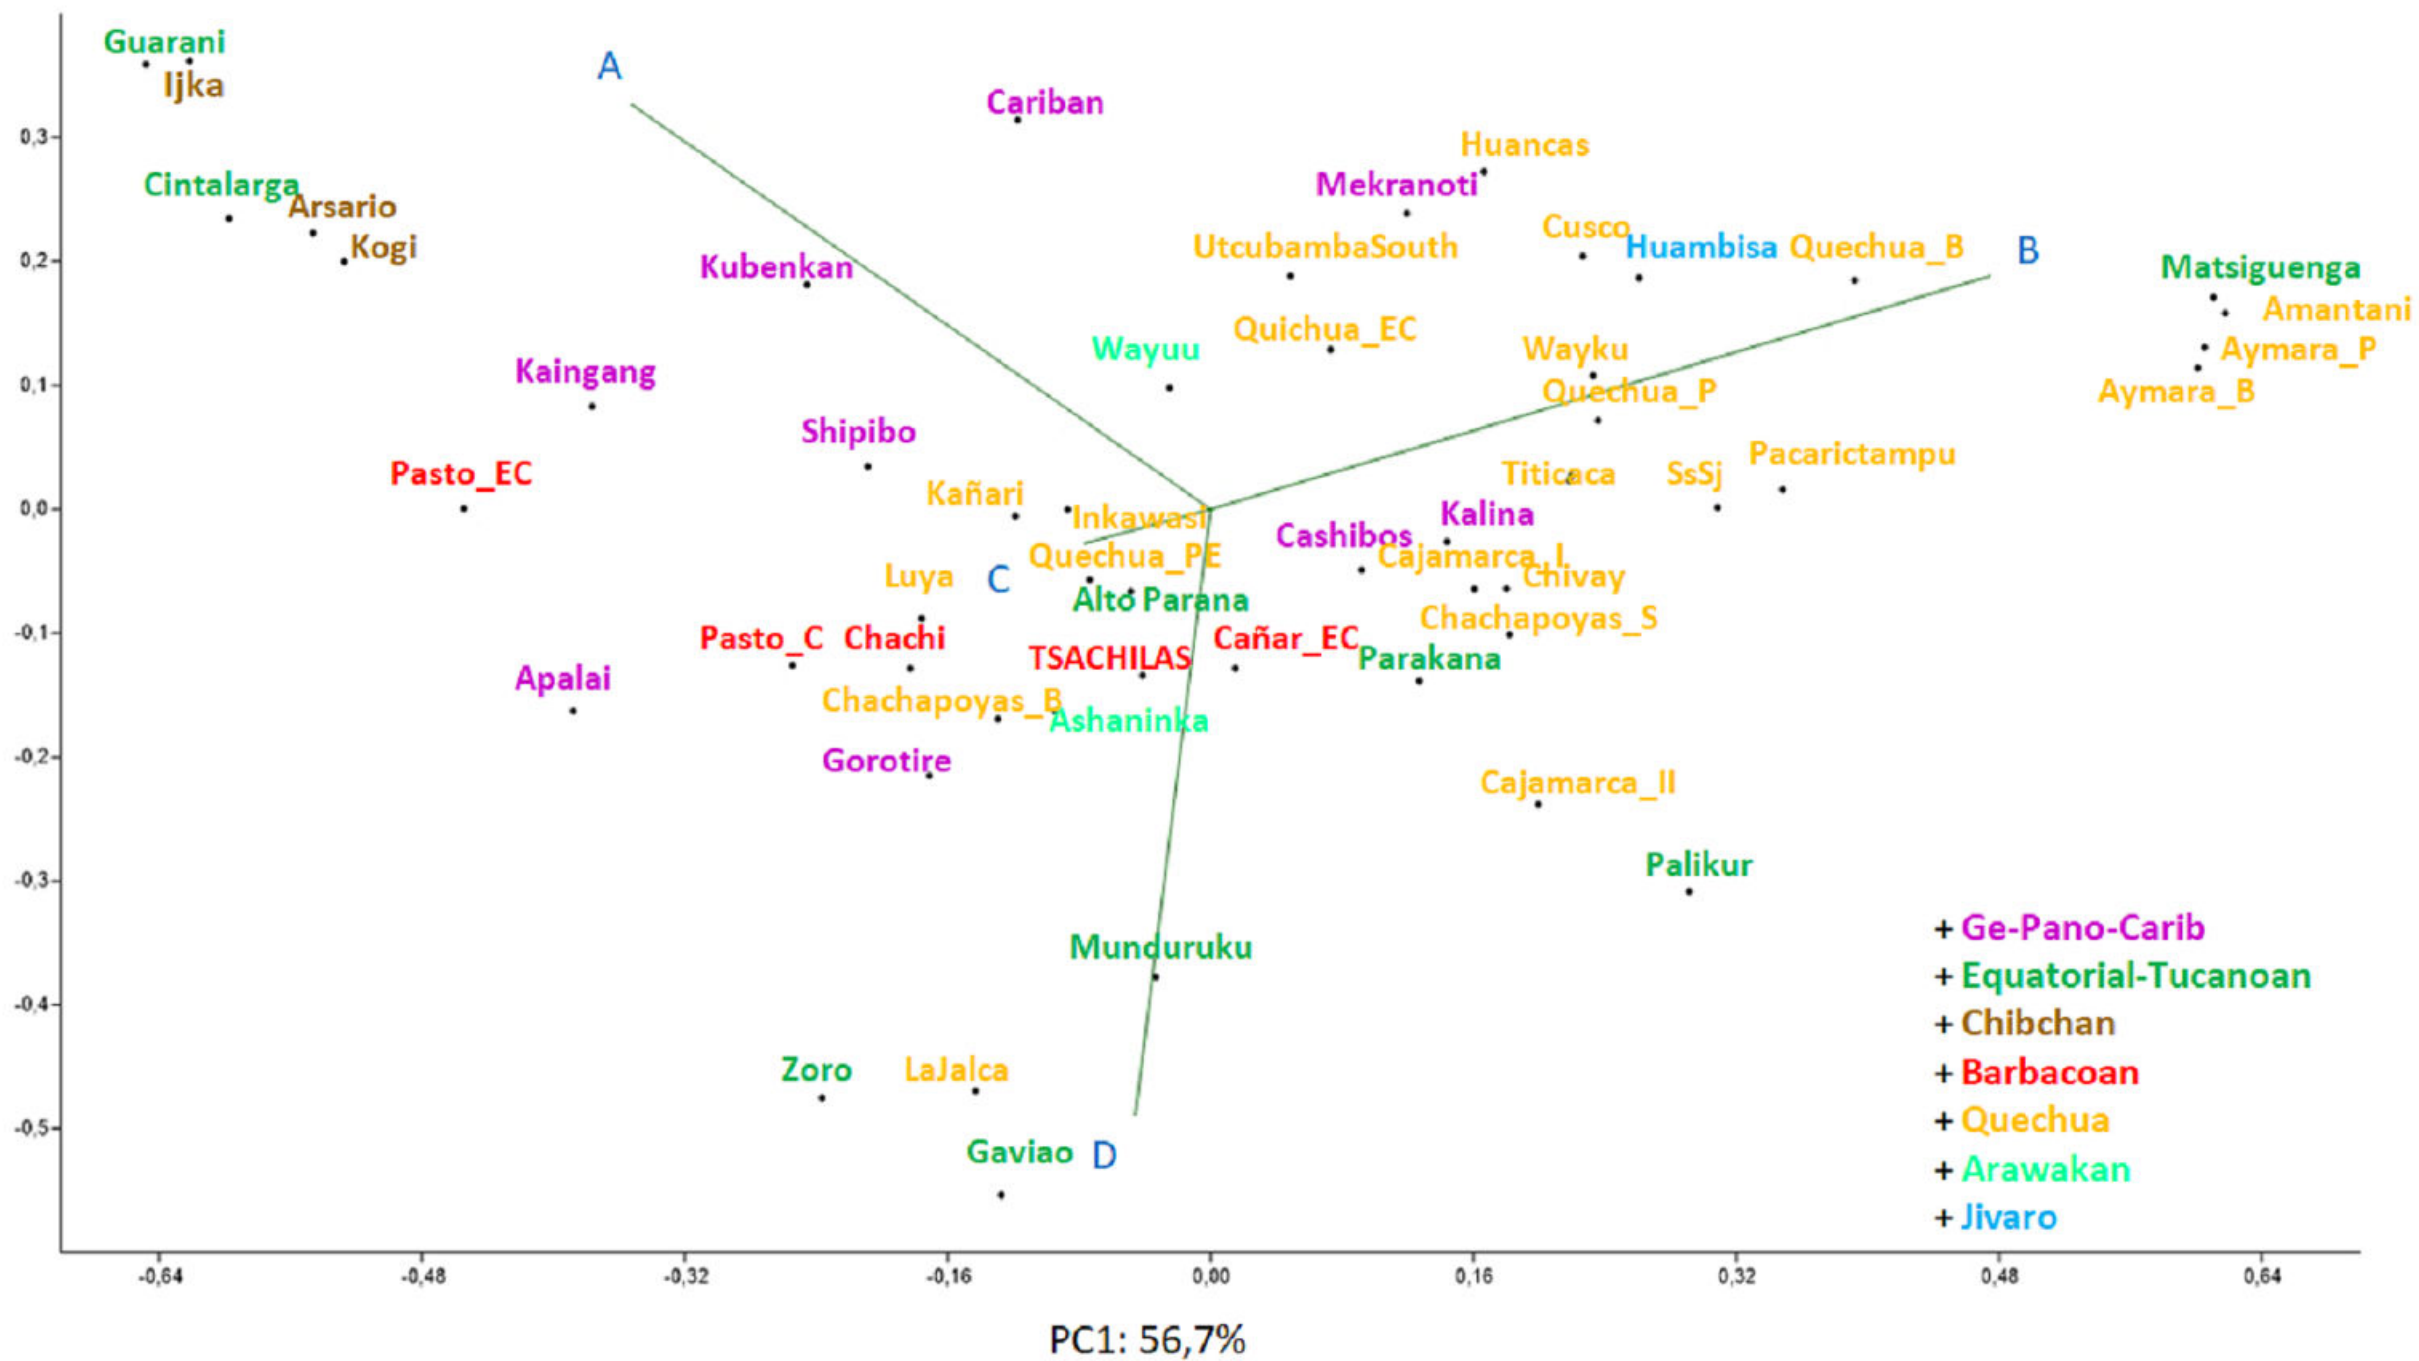

Supplement: s1 [file s1]
